# Supplementary figures and images for: Identification of Potential Metabolic Markers of Hypertension in Chinese Children
Source: Hindawi journal article supplement (doi:10.1155/2021/6691734), 2021-08-24

A

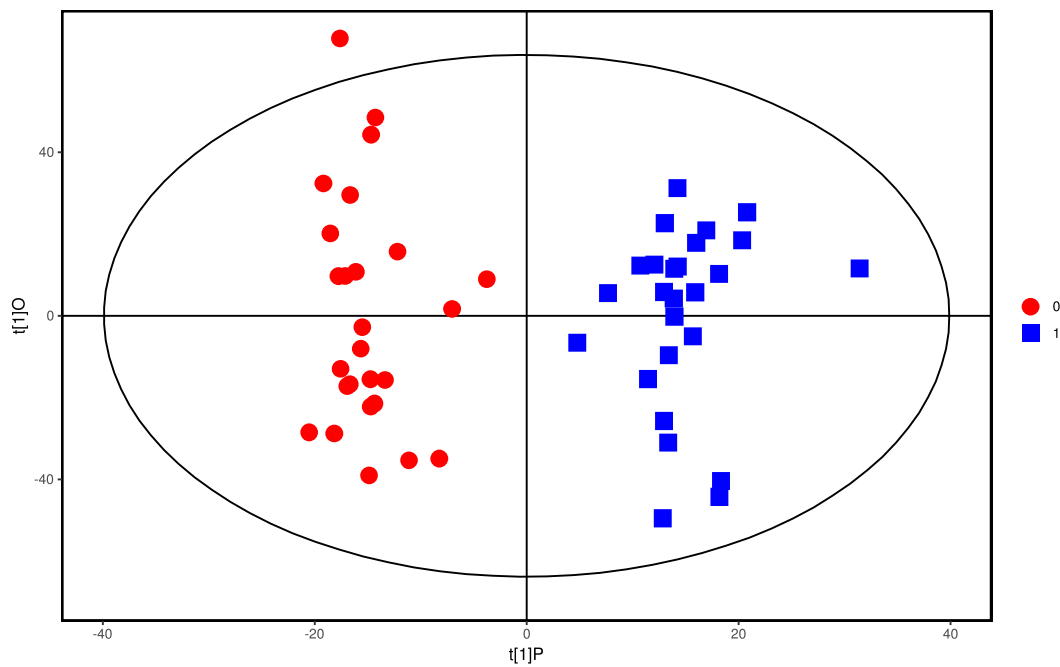

B

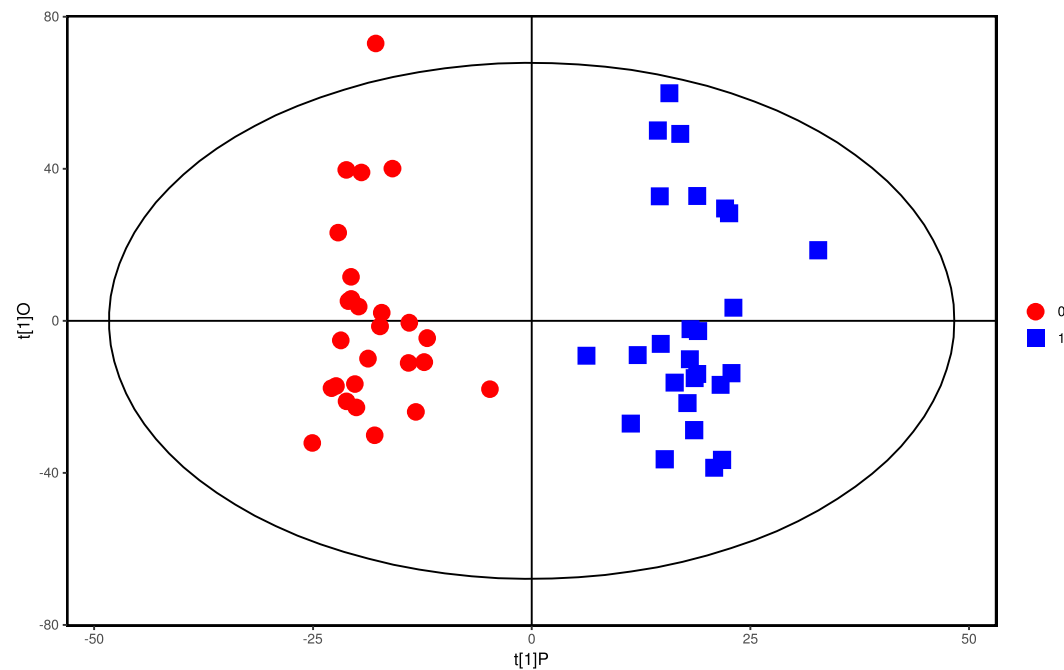

C

Intercepts:  $R^2Y(\text{cum}) = (0, 0.89)$ ,  $Q^2(\text{cum}) = (0, -0.86)$

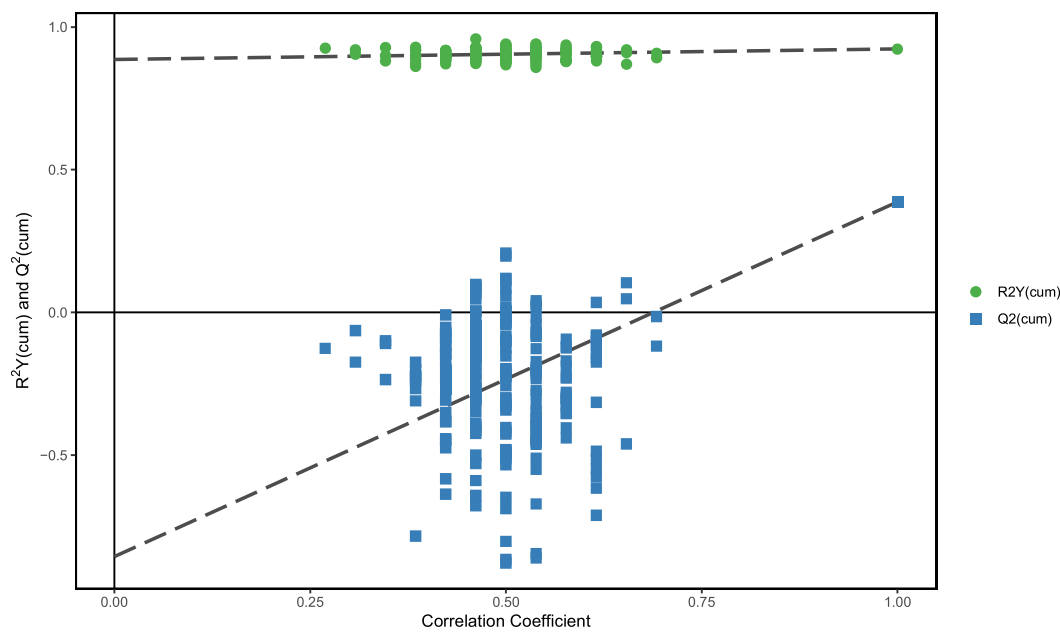

D

Intercepts:  $R^2Y(\text{cum}) = (0, 0.9)$ ,  $Q^2(\text{cum}) = (0, -0.56)$

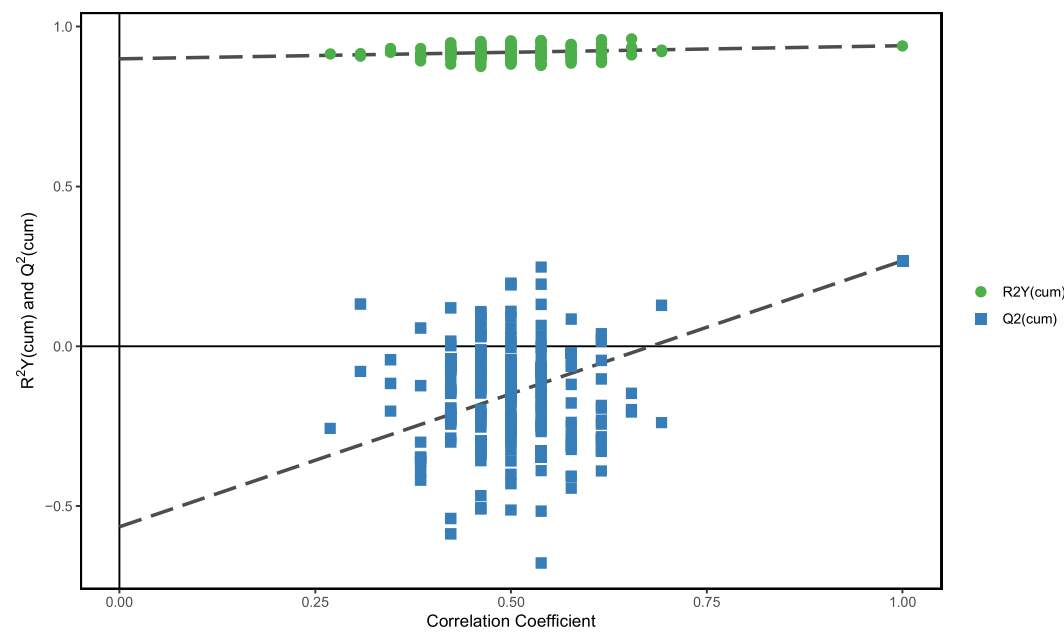

Figure S1

Supplement: f1 [file 6691734.f1.zip]
